# Supplementary material for: Curcumae Radix Decreases Neurodegenerative Markers through Glycolysis Decrease and TCA Cycle Activation
Source: Nutrients. 2022 Apr 11;14(8):1587. doi: 10.3390/nu14081587 (PMC9024545; doi:10.3390/nu14081587)
Supplement: Supplementary file 1 [file nutrients-14-01587-s001.zip › nutrients-1641609-supplementary.pdf]

## Supplementary Material

### 1. Supplementary Figures

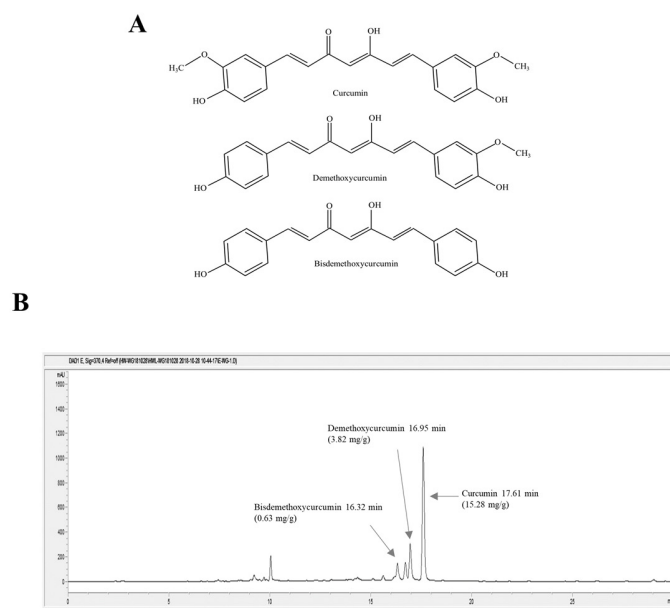

**Figure S1. Quatitative Analysis of major ingredients in Curcumae Radix Extract. (A)** The structures of three reference standards (curcumin, demethoxycurcumin, and bisdemethoxycurcumin), **(B)** Curcumae radix 70% ethanol extraction.

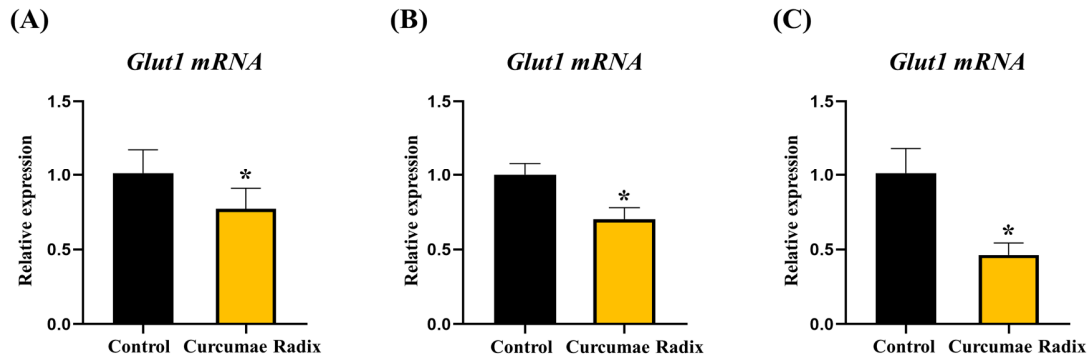

**Figure S2. Curcumae Radix reduce glucose transport.** (A) Glut1 mRNA levels were measured by quantitative RT-PCR in the cerebrum of Curcumae radix group treated CRE and vehicle group treated water (50 mg/kg body weight,  $n = 6$ ). (B) Glut1 mRNA levels were measured by quantitative RT-PCR in DBT cell of Curcumae radix treated. Curcumae radix group treated CRE 4ug/ml. (C) Glut1 mRNA levels were measured by quantitative RT-PCR in the cerebrum of Curcumae radix treated Tau transgenic male mice. Curcumae radix group treated CRE and vehicle group treated water (50 mg/kg body weight,  $n = 3$ ). RPLPO was used for an internal control. The values stand for means  $\pm$  S.D. \*  $p < 0.05$  was compared to groups indicated. All experiments were repeated at least 3.

**A**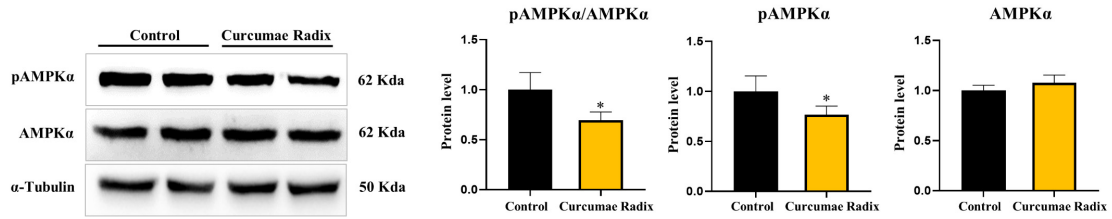**B**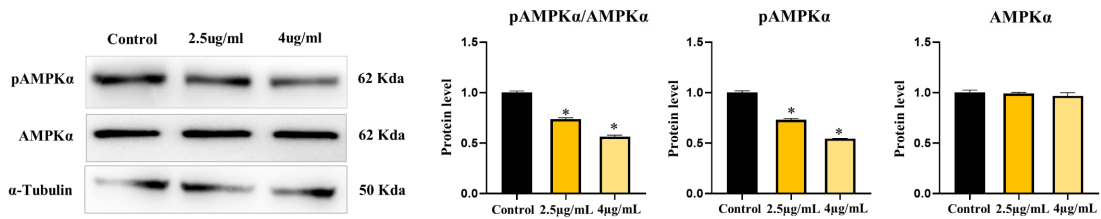

**Figure S3. Curcuma Radix improves the energy state.** (A) Western blot analysis and quantification of Western blot analysis and quantification of phospho-AMPKα (pAMPKα) and AMPKα genes were evaluated in the cerebrum of Curcuma Radix treated male mice. Alpha-Tubulin was used for an internal control. (B) Western blot analysis and quantification of Western blot analysis and quantification of pAMPKα and AMPKα genes were evaluated in DBT cell of Curcuma Radix treated. Alpha-Tubulin was used for an internal control. Curcuma Radix group treated Curcuma Radix extract 2.5 ug/ml, 4 ug/ml. The values stand for means  $\pm$  S.D. \*  $p < 0.05$  was compared to the groups indicated. All experiments were repeated at least 3.
